# Supplementary material for: Solid-state thiolate-stabilized copper nanoclusters with ultrahigh photoluminescence quantum yield for white light-emitting devices
Source: Royal Society of Chemistry journal article supplement (doi:10.1039/d0nr03640d), 2020-01-01
Supplement: d0nr03640d1.pdf [file d0nr03640d1.pdf]

## Supporting Information

### **Solid-state thiolate-stabilized copper nanoclusters with ultrahigh photoluminescence quantum yield for white light-emitting devices**

Hao-Hua Deng,<sup>a</sup> Qiong-Qiong Zhuang,<sup>a</sup> Kai-Yuan Huang,<sup>a</sup> Paramasivam Balasubramanian,<sup>a</sup> Zhen Lin,<sup>a</sup> Hua-Ping Peng,<sup>a\*</sup> Xing-Hua Xia,<sup>b</sup> Wei Chen<sup>a\*</sup>

<sup>a</sup> Higher Educational Key Laboratory for Nano Biomedical Technology of Fujian Province, Department of Pharmaceutical Analysis, Fujian Medical University, Fuzhou 350004, China

<sup>b</sup> State Key Laboratory of Analytical Chemistry for Life Science and Collaborative Innovation Center of Chemistry for Life Sciences, School of Chemistry and Chemical Engineering, Nanjing University, Nanjing 210093, China

\* Corresponding author. Tel./fax: +86 591 22862016.

E-mail address: chenandhu@163.com (W. Chen), phpfjmu@126.com (H-P Peng).

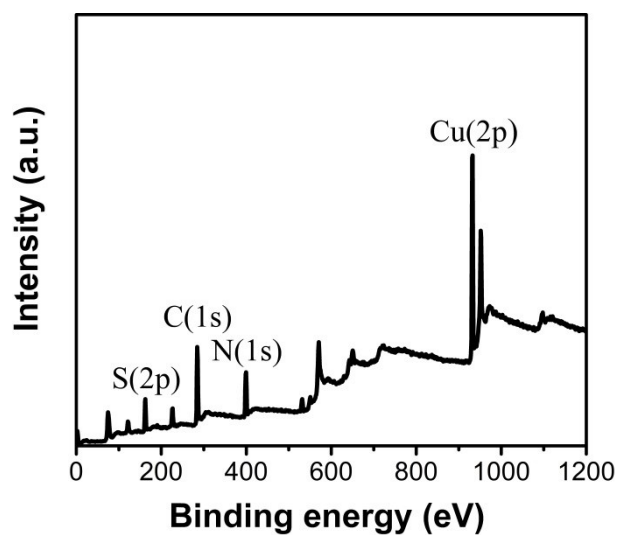

**Fig. S1** Full XPS spectrum of MMI-CuNCs.

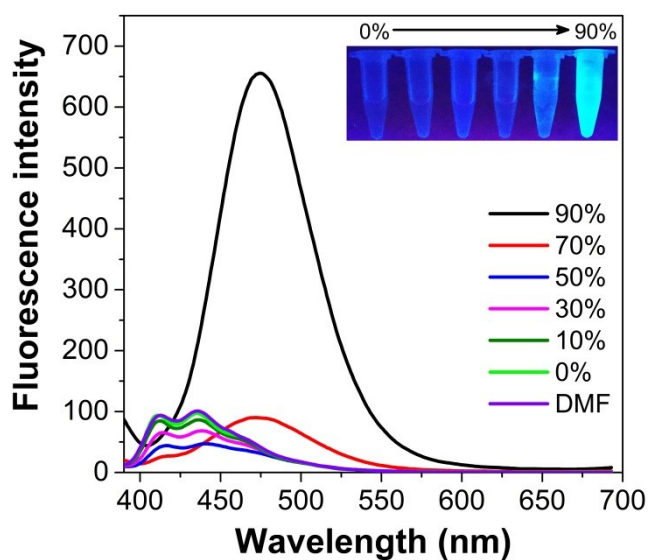

**Fig. S2** Photoemission spectra of the MMI-CuNCs in the water/DMF mixtures with different volumetric fractions of water (vol%). Inset shows the corresponding photographs. Two weak emission peaks at 410 nm and 435 nm were originated from DMF.

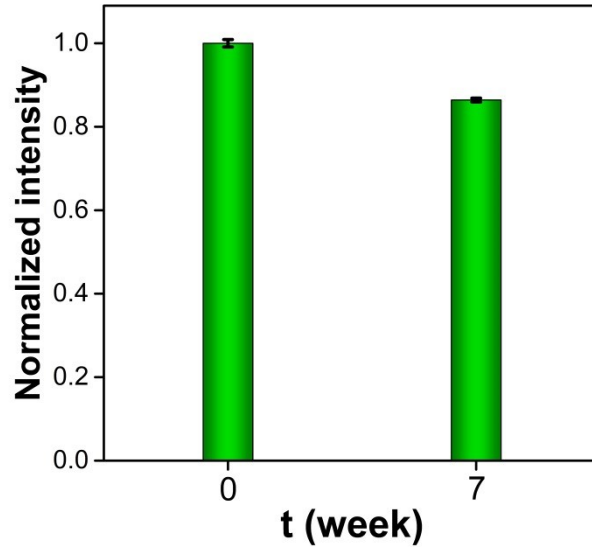

**Fig. S3** Time-stability of the powder of MMI-CuNCs.

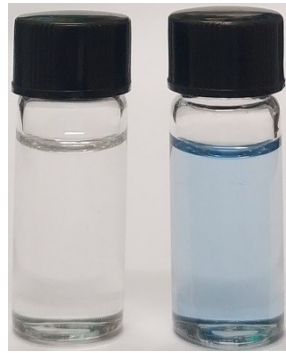

**Fig. S4** Photographs of the dispersion of MMI-CuNCs in DMF (left: freshly prepared, right: placed for 6 h at room temperature).

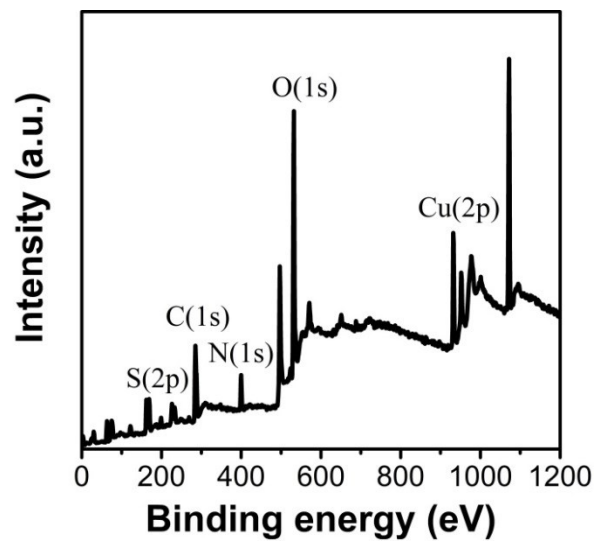

**Fig. S5** Full XPS spectrum of NAC-CuNCs.

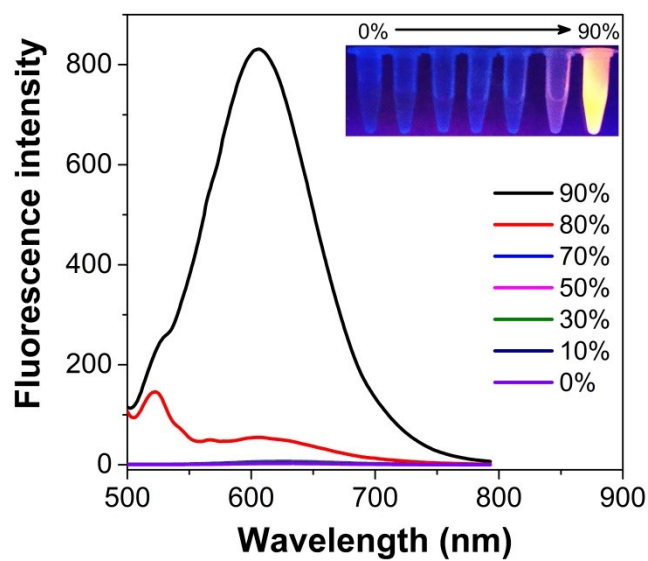

**Fig. S6** Photoemission spectra of the NAC-CuNCs in the ethanol/water mixtures with different volumetric fractions of ethanol (vol%). Inset shows the corresponding photographs.

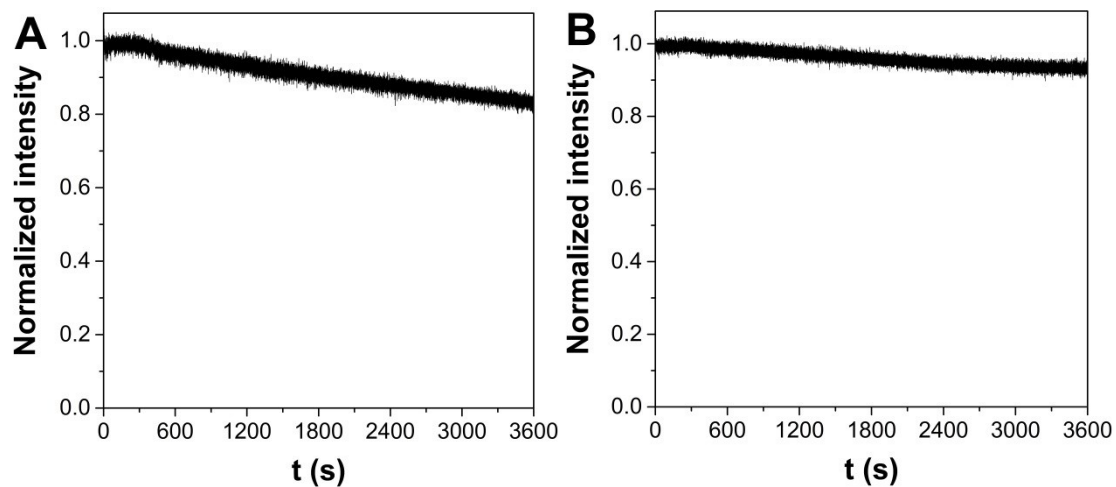

**Fig. S7** Photostability of (A) MMI-CuNCs and (B) NAC-CuNCs.

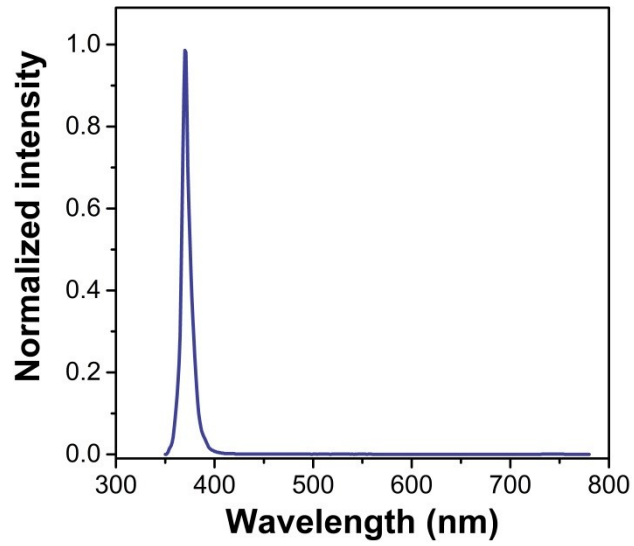

**Fig. S8** Emission spectrum of the commercial GaN LED chips.

**Table S1** The characteristics of the as-fabricated LEDs

| LED    | CIE          | CRI | Correlated color temperature (CCT) (K) |
|--------|--------------|-----|----------------------------------------|
| Cyan   | (0.15, 0.27) | 68  | 100000                                 |
| Orange | (0.48, 0.40) | 69  | 2354                                   |
| White  | (0.26, 0.30) | 83  | 11038                                  |
